# Supplementary material for: T-cell STAT3 is required for the maintenance of humoral immunity to LCMV
Source: PubMed Central journal article supplement — Eur J Immunol. 2014 Dec 15;45(2):418–27. doi: 10.1002/eji.201445060 (PMC4383653; doi:10.1002/eji.201445060), 2014-12-15
Supplement: eji0045-0418-sd1.pdf [file eji0045-0418-sd1.pdf]

# European Journal of Immunology

Supporting Information

for

**DOI 10.1002/eji.201445060**

David R. McIlwain, Melanie Grusdat, Vitaly I. Pozdeev, Haifeng C. Xu,  
Prashant Shinde, Colin Reardon, Zhenyue Hao, Marc Beyer, Andreas Bergthaler,  
Dieter Häussinger, Garry P. Nolan, Karl S. Lang and Philipp A. Lang

**T-cell STAT3 is required for the maintenance of humoral immunity to LCMV**

## Supporting Information Figure 1

**A**

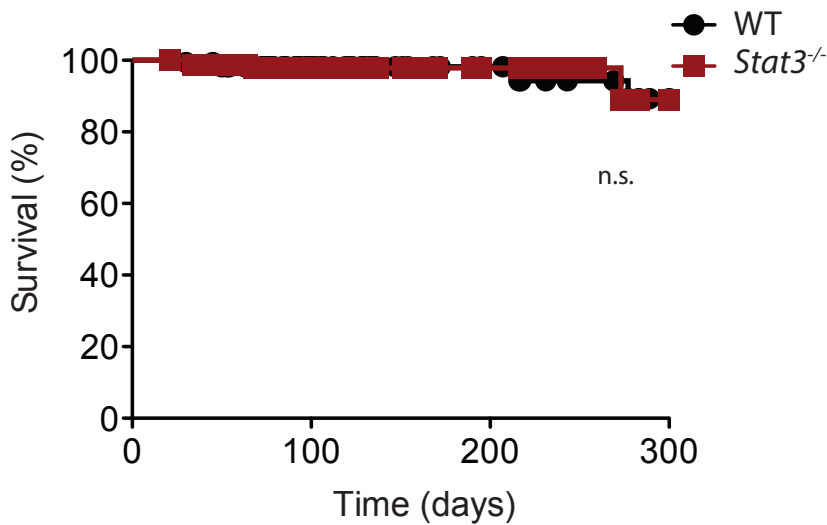

**B**

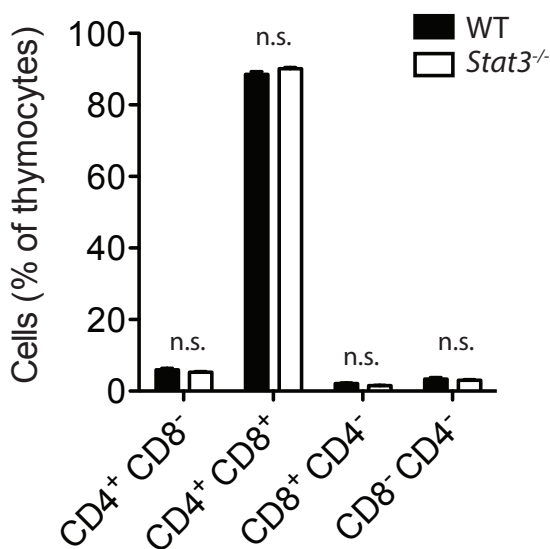

**C**

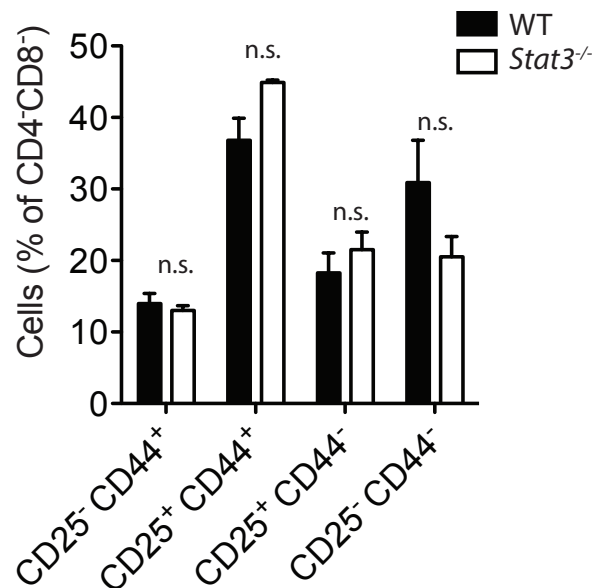

**Supporting Information Figure 1:** Thymic T cell populations and survival are similar between naïve control and T-cell STAT3 deficient mice. (A) Survival of naïve uninfected *Lck-Cre*<sup>-</sup> *Stat3*<sup>fl/fl</sup> vs. *Lck-Cre*<sup>+</sup> *Stat3*<sup>fl/fl</sup> mice was monitored over time (mean ± SEM; n=155-175 mice/group). (B) CD4<sup>+</sup>, CD8<sup>+</sup>, CD4<sup>+</sup>CD8<sup>+</sup> and CD4<sup>-</sup>CD8<sup>-</sup> T-cells were measured in naïve thymus samples from *Lck-Cre*<sup>-</sup> *Stat3*<sup>fl/fl</sup> vs. *Lck-Cre*<sup>+</sup> *Stat3*<sup>fl/fl</sup> mice (mean ± SEM; n=5-6 mice, data pooled from 2 independent experiments). (C) CD44 and CD25 expression were analyzed on double negative (CD4<sup>-</sup>CD8<sup>-</sup>) T cells in naïve thymus from *Lck-Cre*<sup>-</sup> *Stat3*<sup>fl/fl</sup> vs. *Lck-Cre*<sup>+</sup> *Stat3*<sup>fl/fl</sup> mice (mean ± SEM; n=5-6 mice). Data shown in (B and C) are pooled from 2 independent experiments. Statistical significance between groups was determined by Student's *t*-test or Kaplan Meier log rank test for survival data.

## Supporting Information Figure 2

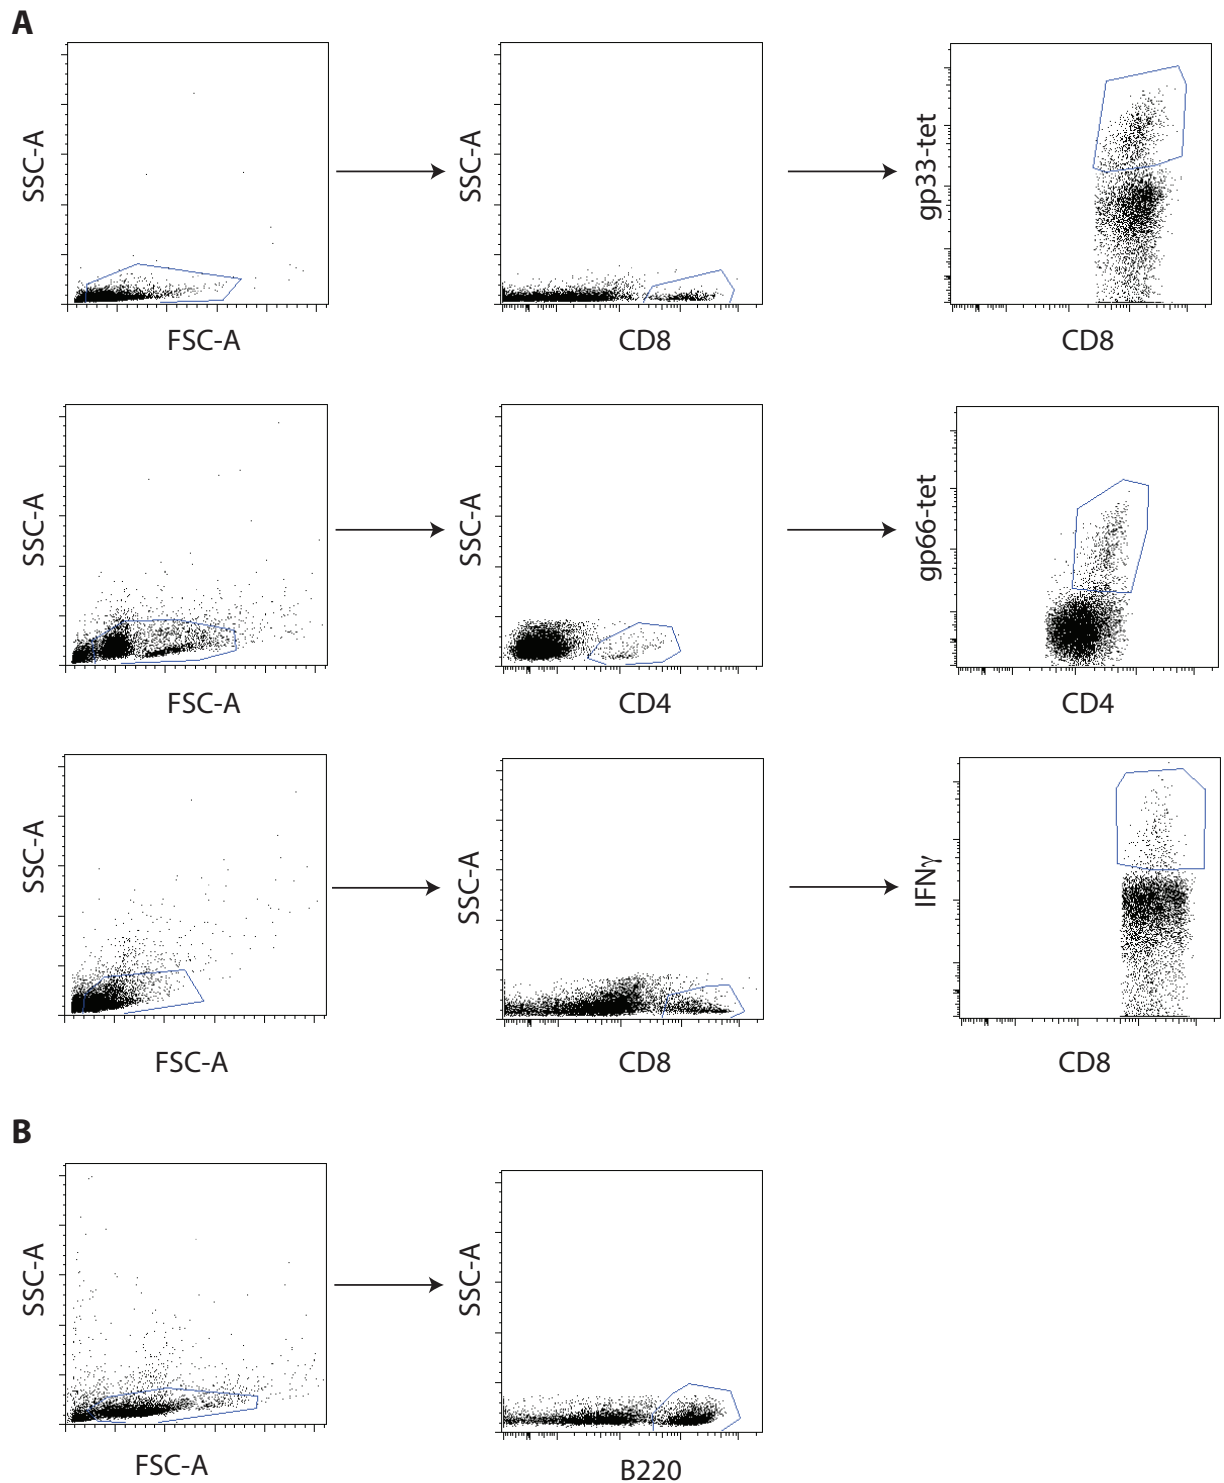

**Supporting Information Figure 2:** Representative flow cytometry gating strategy. (A) pre-gating strategy used to identify T cells, including tetramer positive CD8 (upper panel) or CD4 (middle panel) or IFN $\gamma$  positive (lower panel) T cells as shown in figure 1. (B) pre-gating strategy used to identify B cells as shown in figure 2.

## Supporting Information Figure 3

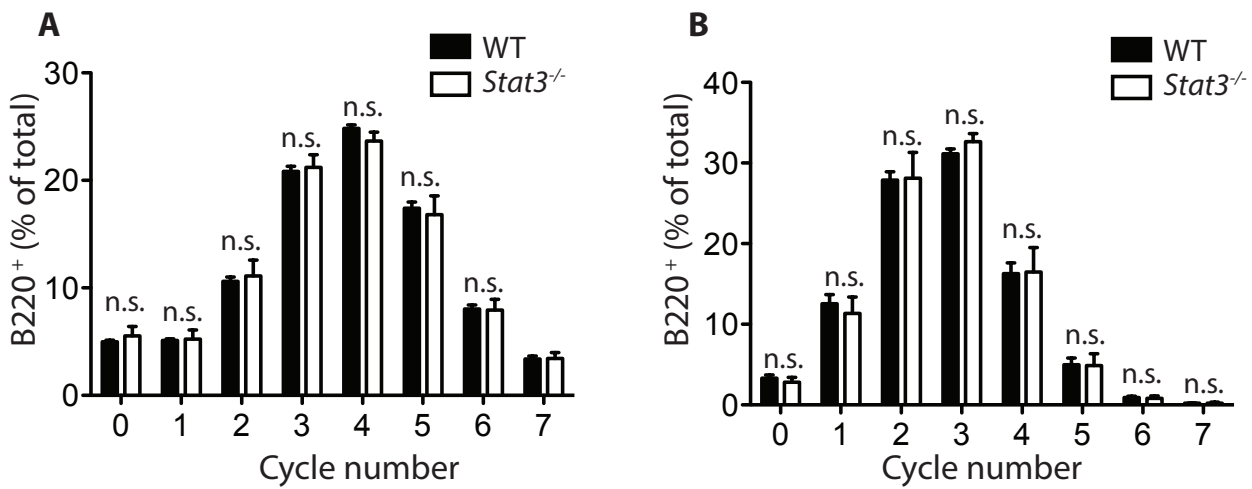

**Supporting Information Figure 3:** B Cell proliferation is unaffected by absence of STAT3 in T cells. Percentage of cells in each division cycle for positively selected (B220<sup>+</sup>), CFSE labeled Lck-Cre-Stat3<sup>fl/fl</sup> vs. Lck-Cre<sup>+</sup> Stat3<sup>fl/fl</sup> B-cells, stimulated with (A) 1 µg/ml LPS or (B) 2 µg/ml CD40-L and 10 ng/ml Il-4 for 72h as measured by flow cytometry (mean ± SEM; n=4-6 mice). Data is pooled from 2 independent experiments. Statistical significance between groups was determined by Student's *t*-test.
